# Supplementary material for: Varying Cellular Immune Response against SARS-CoV-2 after the Booster Vaccination: A Cohort Study from Fukushima Vaccination Community Survey, Japan
Source: MDPI journal article supplement (doi:10.3390/vaccines11050920), 2023-04-29
Supplement: s1 [file s1]

## Supplemental Material

Table S1. Descriptive detail data of reactive interpretation of T-SPOT.COVID

Table S2. Missing data of reactive interpretation of T-SPOT.COVID

Table S3. Details of the information and results of the previously infected participants

Table S4. Descriptive data of reactive interpretation of T-SPOT.COVID

Figure S1. Difference in anti-SARS-COV-2 IgG titer between non-reactive & borderline and reactive group  
of T-SPOT.COVID

**Table S1. Descriptive detail data of reactive interpretation of T-SPOT.COVID.**

| Variables                       | N=1089     | Reactive Interpretation  |                      |                        |
|---------------------------------|------------|--------------------------|----------------------|------------------------|
|                                 |            | Non-Reactive<br>(n =250) | Reactive<br>(n =700) | Borderline<br>(n =139) |
| Comorbidities                   |            |                          |                      |                        |
| At least one                    | 616 (56.4) | 182 (72.8)               | 355 (50.7)           | 79 (56.8)              |
| DETAILS                         |            |                          |                      |                        |
| Hypertension                    | 295 (27.0) | 102 (41.0)               | 152 (21.8)           | 41 (29.5)              |
| Dyslipidemia                    | 95 (8.7)   | 22 (8.8)                 | 59 (8.5)             | 14 (10.1)              |
| Heart disease                   | 96 (8.8)   | 35 (14.1)                | 46 (6.6)             | 15 (10.8)              |
| Diabetes                        | 88 (8.1)   | 36 (14.5)                | 42 (6.0)             | 10 (7.2)               |
| Allergic disease                | 54 (4.9)   | 9 (3.6)                  | 39 (5.6)             | 6 (4.3)                |
| Asthma                          | 43 (3.9)   | 10 (4.0)                 | 28 (4.0)             | 5 (3.6)                |
| Liver disease                   | 69 (6.3)   | 22 (8.8)                 | 38 (5.4)             | 9 (6.5)                |
| Cancer                          | 42 (3.8)   | 17 (6.8)                 | 19 (2.7)             | 6 (4.3)                |
| Gout                            | 23 (2.1)   | 9 (3.6)                  | 10 (1.4)             | 4 (2.9)                |
| Thyroid disease                 | 30 (2.7)   | 5 (2.0)                  | 22 (3.2)             | 3 (2.2)                |
| Lung disease                    | 23 (2.1)   | 10 (4.0)                 | 11 (1.6)             | 2 (1.4)                |
| Mental disease                  | 20 (1.8)   | 11 (4.4)                 | 6 (0.9)              | 3 (2.2)                |
| Rheumatism                      | 21 (1.9)   | 11 (4.4)                 | 7 (1.0)              | 3 (2.2)                |
| Kidney disease                  | 8 (0.7)    | 2 (0.8)                  | 4 (0.6)              | 2 (1.4)                |
| Anaphylaxis                     | 8 (0.7)    | 3 (1.2)                  | 4 (0.6)              | 1 (0.7)                |
| Collagen disease                | 8 (0.7)    | 3 (1.2)                  | 3 (0.4)              | 2 (1.4)                |
| Immune deficiency               | 4 (0.4)    | 1 (0.4)                  | 2 (0.3)              | 1 (0.7)                |
| Others                          | 197 (18.0) | 68 (27.4)                | 109 (15.6)           | 20 (14.4)              |
| Drug                            |            |                          |                      |                        |
| At least one                    | 180 (16.5) | 62 (24.8)                | 87 (12.4)            | 31 (22.3)              |
| DETAILS                         |            |                          |                      |                        |
| Steroid                         | 32 (2.9)   | 15 (6.1)                 | 14 (2.1)             | 3 (2.2)                |
| NSAIDs                          | 83 (7.6)   | 27 (11.0)                | 43 (6.3)             | 13 (9.6)               |
| Acetaminophen                   | 34 (3.1)   | 9 (3.7)                  | 18 (2.6)             | 7 (5.1)                |
| Antihistamine                   | 50 (4.6)   | 16 (6.5)                 | 27 (3.9)             | 7 (5.1)                |
| Biologics                       | 14 (1.3)   | 5 (2.0)                  | 8 (1.2)              | 1 (0.7)                |
| Anticancer agent                | 5 (0.5)    | 0 (0)                    | 4 (0.6)              | 1 (0.7)                |
| Immunosuppressants              | 4 (0.4)    | 2 (0.8)                  | 2 (0.3)              | 0 (0)                  |
| Adverse reaction after 2nd dose |            |                          |                      |                        |
| At least once                   | 825 (75.5) | 137 (54.8)               | 587 (84.0)           | 101 (73.2)             |
| DETAILS                         |            |                          |                      |                        |
| Local Pain                      | 563 (51.6) | 88 (35.3)                | 405 (58.0)           | 70 (50.7)              |
| Fever over 37.5 degree          | 154 (14.1) | 18 (7.2)                 | 123 (17.6)           | 13 (9.4)               |
| Fever under 37.5 degree         | 265 (24.3) | 18 (7.2)                 | 217 (31.1)           | 30 (21.6)              |
| Fatigue                         | 514 (47.1) | 59 (23.7)                | 396 (56.7)           | 59 (42.4)              |
| Joint pain                      | 273 (25.0) | 24 (9.6)                 | 222 (31.8)           | 27 (19.4)              |
| Headache                        | 317 (29.0) | 43 (17.3)                | 240 (34.4)           | 34 (24.5)              |
| Dizziness                       | 52 (4.8)   | 6 (2.4)                  | 45 (6.4)             | 1 (0.7)                |
| Nausea                          | 46 (4.2)   | 3 (1.2)                  | 38 (5.4)             | 5 (3.6)                |
| Diarrhea                        | 27 (2.5)   | 1 (0.4)                  | 24 (3.4)             | 2 (1.4)                |
| Others                          | 55 (5.0)   | 10 (4.0)                 | 36 (5.2)             | 9 (6.5)                |
| Adverse reaction after 3rd dose |            |                          |                      |                        |

|                         |            |            |            |            |
|-------------------------|------------|------------|------------|------------|
| At least once           | 876 (80.2) | 153 (62.2) | 612 (88.3) | 111 (81.0) |
| DETAIL                  |            |            |            |            |
| Local Pain              | 663 (60.7) | 115 (46.0) | 454 (65.2) | 94 (67.6)  |
| Fever over 37.5 degree  | 135 (12.4) | 16 (6.4)   | 97 (13.9)  | 22 (15.8)  |
| Fever under 37.5 degree | 285 (26.1) | 16 (6.4)   | 253 (36.4) | 16 (11.5)  |
| Fatigue                 | 474 (43.4) | 43 (17.2)  | 377 (54.2) | 54 (38.8)  |
| Joint pain              | 323 (29.6) | 37 (14.8)  | 251 (36.1) | 35 (25.2)  |
| Headache                | 294 (26.9) | 29 (11.6)  | 239 (34.3) | 26 (18.7)  |
| Dizziness               | 51 (4.7)   | 7 (2.8)    | 40 (5.7)   | 4 (2.9)    |
| Nausea                  | 46 (4.2)   | 4 (1.6)    | 36 (5.2)   | 6 (4.3)    |
| Diarrhea                | 31 (2.8)   | 4 (1.6)    | 25 (3.6)   | 2 (1.4)    |
| Others                  | 69 (6.3)   | 5 (2.0)    | 57 (8.2)   | 7 (5.0)    |

Number (percentage) are shown for continuous or categorical variables. Abbreviations; NSAIDs: Non-Steroidal Anti-Inflammatory Drugs.

**Table S2. Missing data of reactive interpretation of T-SPOT.COVID**

| Variables                                             | Reactive Interpretation  |                      |                        |
|-------------------------------------------------------|--------------------------|----------------------|------------------------|
|                                                       | Non-Reactive<br>(n =250) | Reactive<br>(n =700) | Borderline<br>(n =139) |
| Age                                                   | 0 (0)                    | 0 (0)                | 0 (0)                  |
| Sex                                                   | 0 (0)                    | 0 (0)                | 0 (0)                  |
| Blood type                                            | 33 (13.2)                | 27 (3.9)             | 3 (2.2)                |
| Days between booster vaccination and blood collection | 0 (0)                    | 0 (0)                | 0 (0)                  |
| Vaccine type                                          | 0 (0)                    | 0 (0)                | 0 (0)                  |
| Previous infection                                    | 0 (0)                    | 0 (0)                | 0 (0)                  |
| IgG (S)                                               | 0 (0)                    | 0 (0)                | 0 (0)                  |
| Smoking                                               | 8 (3.2)                  | 13 (1.9)             | 4 (2.9)                |
| Drinking Habits                                       | 11 (4.4)                 | 20 (2.9)             | 8 (5.8)                |
| Comorbidities                                         | 0 (0)                    | 0 (0)                | 0 (0)                  |
| Drug                                                  | 0 (0)                    | 0 (0)                | 0 (0)                  |
| Adverse reaction after 2nd and 3rd dose vaccination   | 4 (1.6)                  | 8 (1.1)              | 3 (2.2)                |
| Adverse reaction after 2nd dose vaccination           | 0 (0)                    | 1 (0.1)              | 1 (0.7)                |
| Adverse reaction after 3rd dose vaccination           | 4 (1.6)                  | 7 (1.0)              | 2 (1.4)                |

Number (percentage) are shown for continuous or categorical variables.

**Table S3. Details of the information and results of the previously infected participants**

| # | sex    | age | comorbidity | AR after 2 <sup>nd</sup> / 3 <sup>rd</sup><br>dose | Days between<br>booster<br>vaccination and<br>blood collection | T-SPOT.COVID | Nab (AU/ml) | IgG (S) (AU/ml) |
|---|--------|-----|-------------|----------------------------------------------------|----------------------------------------------------------------|--------------|-------------|-----------------|
| 1 | Female | 21  | -           | +/+                                                | 57                                                             | 3            | >500        | 9886            |
| 2 | Female | 68  | HTN, HD, CD | +/+                                                | 60                                                             | 5            | >500        | 5372            |
| 3 | Female | 42  | DM          | +/+                                                | 26                                                             | 9            | >500        | 8657            |
| 4 | Female | 51  | -           | +/+                                                | 58                                                             | 28           | >500        | 5389            |
| 5 | Female | 39  | -           | +/+                                                | 58                                                             | 50           | >500        | 8853            |

Median [Inter Quartile] or number (percentage) are shown for continuous or categorical variables. AR adverse reaction, HTN hypertension, HD heart disease CD collagen disease, DM diabetes mellitus. Of note, we observed one participant with a nonreactive T-SPOT.COVID result, one with a borderline result, and three with reactive results. These findings align with the cohort without a history of COVID-19 infection (n =1,084), in which 249 (22.9%) individuals had nonreactive results, 138 (12.7%) had borderline results, and 697 (64.3%) had reactive results. In humoral immune response, all individuals with a history of COVID-19 infection showed strong reactivity of neutralizing antibody titer > 500 AU/ml and anti-SARS-CoV-2 IgG >5,000 AU/mL.

**Table S4. Descriptive data of reactive interpretation of T-SPOT.COVID**

| Variables                                           | N=1089              | Reactive Interpretation  |                      |                        |
|-----------------------------------------------------|---------------------|--------------------------|----------------------|------------------------|
|                                                     |                     | Non-Reactive<br>(n =250) | Reactive<br>(n =700) | Borderline<br>(n =139) |
| Age                                                 | 56 [42–68]          |                          |                      |                        |
| <40 years                                           | 215 (19.7)          | 19 (7.6)                 | 177 (25.3)           | 19 (13.7)              |
| 40–65 years                                         | 543 (49.7)          | 93 (37.2)                | 388 (55.4)           | 62 (44.6)              |
| >65 years                                           | 331 (30.3)          | 138 (55.2)               | 135 (19.3)           | 58 (41.7)              |
| Sex - Female                                        | 737 (67.5)          | 151 (60.4)               | 487 (69.6)           | 99 (71.2)              |
| Blood type                                          |                     |                          |                      |                        |
| A                                                   | 392 (35.9)          | 87 (40.1)                | 257 (38.2)           | 48 (35.3)              |
| B                                                   | 223 (20.4)          | 49 (22.6)                | 139 (20.7)           | 35 (25.7)              |
| O                                                   | 316 (28.9)          | 66 (30.4)                | 211 (31.4)           | 39 (28.7)              |
| AB                                                  | 95 (8.7)            | 15 (6.9)                 | 66 (9.8)             | 14 (10.3)              |
| Days from booster vaccination                       | 53 [29–65]          | 54 [30–65]               | 52 [29–65]           | 54 [29–64]             |
| <30 days                                            | 332 (30.4)          | 77 (30.8)                | 212 (30.3)           | 43 (30.9)              |
| 30–60 days                                          | 367 (33.6)          | 83 (33.2)                | 237 (33.9)           | 47 (33.8)              |
| >60 days                                            | 390 (35.7)          | 90 (36.0)                | 251 (35.9)           | 49 (35.3)              |
| Vaccine type                                        |                     |                          |                      |                        |
| BNT162b2 (Pfizer–BioNTech)                          | 682 (62.5)          | 131 (52.4)               | 459 (65.6)           | 92 (66.2)              |
| mRNA-1273 (Moderna)                                 | 407 (37.3)          | 119 (47.6)               | 241 (34.4)           | 47 (33.8)              |
| Previous infection- IgN $\geq$ 10.0                 | 11 (1.0)            | 1 (0.0)                  | 9 (0.8)              | 1 (0.0)                |
| anti-SARS-COV-2 IgG titer<br>(AU/ml)                | 2221<br>[1376–3966] | 1593<br>[977.5–2603]     | 2674<br>[1608–4418]  | 1853<br>[1202–3606]    |
| Smoking                                             | 194 (17.8)          | 38 (15.7)                | 132 (19.2)           | 24 (17.8)              |
| Drinking Habits                                     | 406 (37.2)          | 83 (34.7)                | 276 (40.6)           | 47 (35.9)              |
| Comorbidities - At least one                        | 616 (56.4)          | 182 (72.8)               | 355 (50.7)           | 79 (56.8)              |
| Drug - At least one                                 | 180 (16.5)          | 62 (24.8)                | 87 (12.4)            | 31 (22.3)              |
| Adverse reaction after 2nd and 3rd dose vaccination |                     |                          |                      |                        |
| At least once                                       | 930 (85.2)          | 175 (71.1)               | 636 (91.9)           | 119 (87.5)             |
| Adverse reaction after 2nd dose vaccination         |                     |                          |                      |                        |
| At least once                                       | 825 (75.5)          | 137 (54.8)               | 587 (84.0)           | 101 (73.2)             |
| Adverse reaction after 3rd dose vaccination         |                     |                          |                      |                        |
| At least once                                       | 876 (80.2)          | 153 (62.2)               | 612 (88.3)           | 111 (81.0)             |

Median [Inter Quartile] or number (percentage) are shown for continuous or categorical variables. Of note, a significant difference in age groups was observed between those receiving BNT162b2 and mRNA-1273 vaccines for booster administration. (p with Pearson's chi-square test <0.001); the numbers (percentages) in <40 years, 40–65 years, and >65 years old were 150 (22.0), 391 (57.3), and 141 (20.7) in BNT162b2, and 65 (16.0), 152 (37.3), 190 (46.7) in mRNA-1273 group, respectively.

**Figure S1. Difference in anti-SARS-COV-2 IgG titer between non-reactive & borderline and reactive group of T-SPOT.COVID**

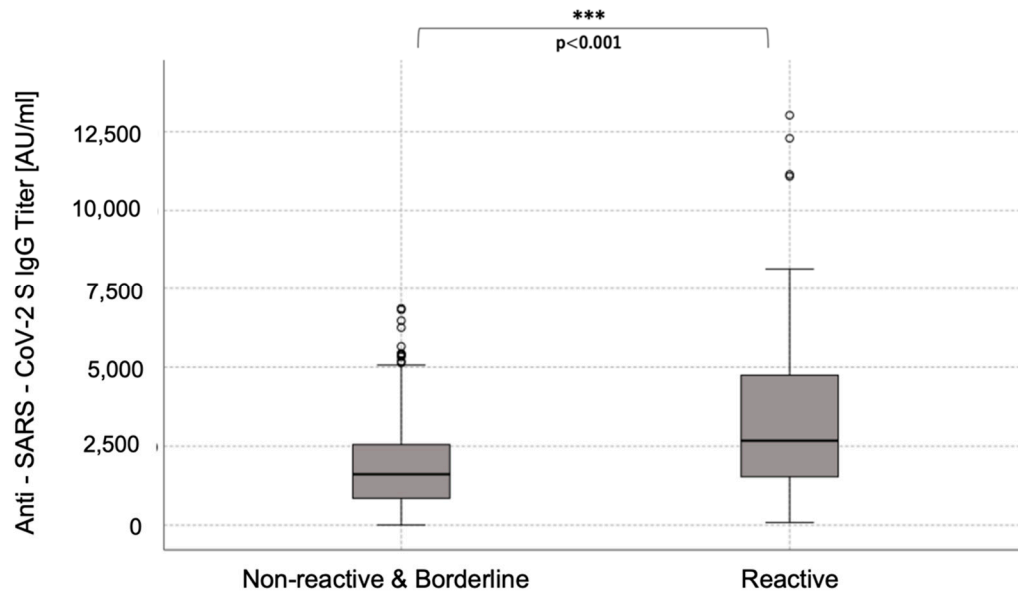

Box-and-whisker plots show the difference in anti-SARS-COV-2 IgG titer between non-reactive & borderline and reactive group of T-SPOT.COVID. In each box-and-whisker plot, the horizontal line represents the median, the top and bottom of the boxes the interquartile range, and the I bar the minimum and maximum values. Spots  $\geq 50$  is scored as 50. Spots  $\leq 4$ , 5–7, and  $\geq 8$  were considered as non-reactive, borderline and reactive respectively.
